# Supplementary figures and images for: Combining Nanopore Sequencing with Recombinase Polymerase Amplification Enables Identification of Dinoflagellates from the Alexandrium Genus, Providing a Rapid, Field Deployable Tool
Source: MDPI journal article supplement (doi:10.3390/toxins15060372), 2023-06-01

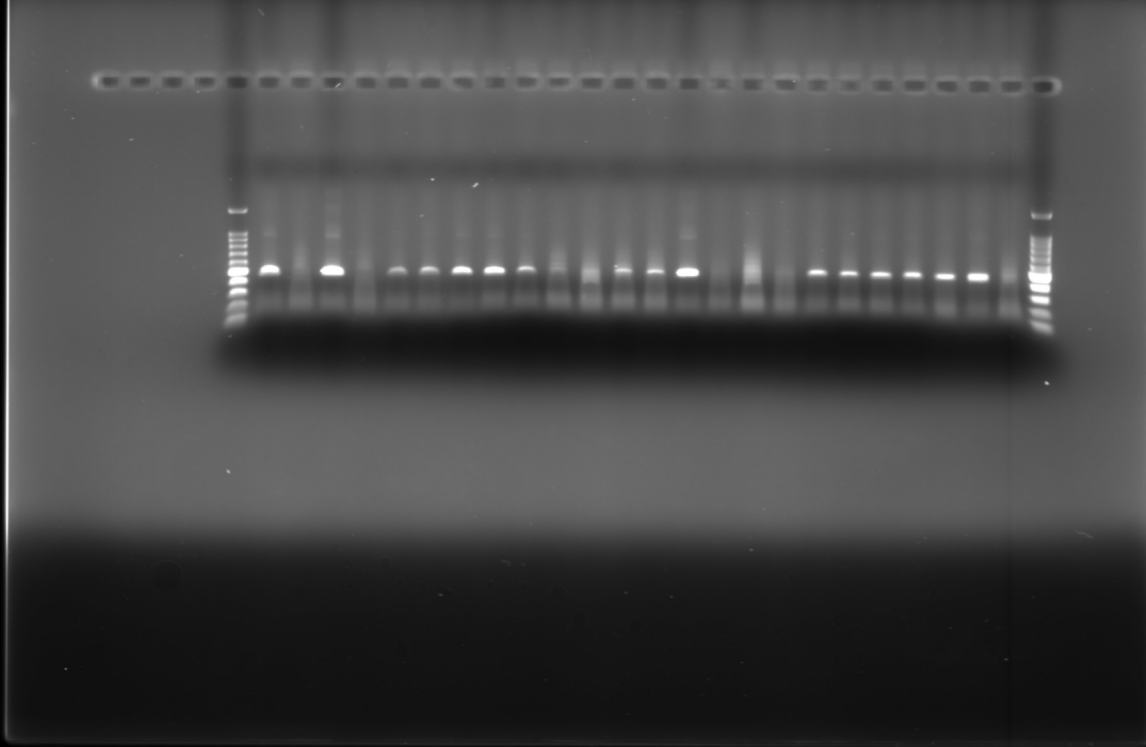

Supplement: s1 [file s1]
